# Supplementary material for: Longitudinal Association of Telomere Attrition with the Effects of Antihypertensive Treatment and Blood Pressure Lowering
Source: PubMed Central journal article supplement (PMC7220288; doi:10.14336/ad.2019.0721), 2019-07-21
Supplement: AD-11-3-494-s.pdf [file AD-11-3-494-s.pdf]

# Longitudinal Association of Telomere Attrition with the Effects of Antihypertensive Treatment and Blood Pressure Lowering

Shuyuan Zhang<sup>1</sup>, Rongxia Li<sup>1</sup>, Yunyun Yang<sup>1</sup>, Yu Chen<sup>1</sup>, Shujun Yang<sup>1</sup>, Jian Li<sup>1</sup>, Cunjin Wu<sup>2</sup>, Tao Kong<sup>1</sup>, Tianlong Liu<sup>1</sup>, Jun Cai<sup>3</sup>, Li Fu<sup>4</sup>, Yanan Zhao<sup>1</sup>, Rutai Hui<sup>1</sup>, Weili Zhang<sup>1</sup>.

<sup>1</sup>State Key Laboratory of Cardiovascular Disease, FuWai Hospital, National Center for Cardiovascular Diseases, Peking Union Medical College & Chinese Academy of Medical Sciences, Beijing, 100037, China

<sup>2</sup>The second hospital of Tianjin Medical university, Tianjin, 300211, China

<sup>3</sup>Hypertension Centre, FuWai Hospital, National Center for Cardiovascular Diseases, Peking Union Medical College & Chinese Academy of Medical Sciences, Beijing, 100037, China

<sup>4</sup>Benxi Railway Hospital, Liaoning, 117000, China.

## METHODS

### Definition of the end-points

The main end-points included the blood pressure change, and the total cardiovascular diseases (defined as nonfatal myocardial infarction [MI] or fatal coronary heart disease [CHD], and stroke). Blood pressure was measured according to the JNC7 recommendation that patients should be seated quietly for at least 5 minutes in a chair, and arm supported at heart level [1]. All patients received at least two measurements and the average recorded. Caffeine, exercise, and smoking should be avoided for at least 30 minutes before measurement.

The diagnosis of myocardial infarction was confirmed if met the criteria of the World Health Organization (WHO) of the symptoms such as retrosternal pain last for at least 30 minutes and not relieve after taking nitroglycerine, and either electrocardiographic abnormal observed or elevated cardiac enzyme levels [2]. Fatal CHD was recognized to have occurred these situations: fatal MI confirmed by hospital records; CHD or MI as the main cause of death on the death certificate [3]. Stroke was diagnosed according to the WHO criteria definition as “the sudden onset of focal (or global) deficit of cerebral function lasting more than 24 hours (except interrupted by surgery or death)” confirmed by a brain computed tomography or magnetic resonance [4].

## SUPPLEMENTARY DATA

**Supplementary Table 1.** Comparisons of characteristics between total patients and those providing baseline blood samples in the cohort.

| Characteristics           | Total patients in the cohort (n=3,671) | Patients with baseline blood samples (n=1,382) | P value* |
|---------------------------|----------------------------------------|------------------------------------------------|----------|
| Age, years                | 61.4 ± 10.6                            | 61.7 ± 9.7                                     | 0.39     |
| Men, No. (%)              | 1,051 (41.3%)                          | 430 (38.8%)                                    | 0.16     |
| BMI, kg/m <sup>2</sup>    | 26.0 ± 3.4                             | 26.2 ± 3.1                                     | 0.13     |
| Waist-to-hip ratio        | 0.90 ± 0.06                            | 0.90 ± 0.05                                    | 0.91     |
| Systolic BP, mm Hg        | 155 ± 23                               | 159 ± 21                                       | <0.001   |
| Diastolic BP, mm Hg       | 88 ± 12                                | 89 ± 12                                        | 0.13     |
| Current smoking status, % | 19.6                                   | 18.8                                           | 0.59     |
| Current alcohol intake, % | 21.1                                   | 18.0                                           | 0.04     |
| Medical history, %        |                                        |                                                |          |
| Diabetes mellitus         | 20.5                                   | 23.8                                           | 0.03     |
| Cardiovascular diseases   | 36.7                                   | 41.8                                           | <0.001   |

**Abbreviations:** BMI, body mass index; BP, blood pressure. Data are given mean ± SD.

\*P value was calculated by the chi-square test for categorical variables and by the *t* test for continuous variables between the total patients and patients with baseline blood samples.

**Supplementary Table 2.** Characteristics of patients with or without the follow-up blood samples.

| Characteristics               | Included patients with follow-up blood samples (n=1,108) | Excluded patients without follow-up blood samples (n=274) | P value* |
|-------------------------------|----------------------------------------------------------|-----------------------------------------------------------|----------|
| Age, years                    | 61.7 ± 9.7                                               | 61.0 ± 9.9                                                | 0.73     |
| Men, No. (%)                  | 430 (38.8%)                                              | 135 (49.3%)                                               | 0.002    |
| BMI, kg/m <sup>2</sup>        | 26.2 ± 3.1                                               | 26.3 ± 3.4                                                | 0.75     |
| Waist-to-hip ratio            | 0.90 ± 0.05                                              | 0.90 ± 0.06                                               | 0.60     |
| Systolic BP, mm Hg            | 160 ± 21                                                 | 162 ± 21                                                  | 0.25     |
| Diastolic BP, mm Hg           | 89 ± 12                                                  | 90 ± 12                                                   | 0.21     |
| Fasting serum glucose, mmol/L | 6.2 ± 1.7                                                | 6.3 ± 1.7                                                 | 0.51     |
| Lipids, mmol/L                |                                                          |                                                           |          |
| Total cholesterol             | 5.7 ± 1.1                                                | 5.6 ± 0.9                                                 | 0.26     |
| Triglycerides                 | 1.6 (1.1-2.3)                                            | 1.5 (1.1-2.2)                                             | 0.67     |
| HDL-C                         | 1.3 ± 0.3                                                | 1.3 ± 0.3                                                 | 0.77     |
| LDL-C                         | 3.6 ± 0.9                                                | 3.5 ± 0.8                                                 | 0.55     |
| Current smoking status, %     | 18.8                                                     | 12.7                                                      | 0.08     |
| Current alcohol intake, %     | 18.0                                                     | 11.5                                                      | 0.06     |
| Medical history, %            |                                                          |                                                           |          |
| Diabetes mellitus             | 23.8                                                     | 17.5                                                      | 0.26     |
| Cardiovascular diseases       | 41.8                                                     | 37.6                                                      | 0.34     |

**Abbreviations:** BMI, body mass index; BP, blood pressure; HDL-C, high-density lipoprotein cholesterol; LDL-C, low-density lipoprotein cholesterol. Data are given mean ± SD, or median (interquartile range).

\*P value was calculated by the chi-square test for categorical variables, or the *t* test for continuous variables, or the Mann-Whitney *U* test for triglycerides between the included patients and the excluded patients without follow-up blood samples.

# SUPPLEMENTARY DATA

**Supplementary Table 3.** Characteristics of patients with or without receiving antihypertensive treatments at recruitment.

| Characteristics                              | Patients with antihypertensive treatment (n=961) | Patients without antihypertensive treatment (n=147) | <i>P</i> value* |
|----------------------------------------------|--------------------------------------------------|-----------------------------------------------------|-----------------|
| Age, years                                   | 61.9 ± 9.6                                       | 60.4 ± 10.6                                         | 0.09            |
| Men, No. (%)                                 | 363 (37.8%)                                      | 67 (45.6%)                                          | 0.08            |
| BMI, kg/m <sup>2</sup>                       | 26.3 ± 3.1                                       | 26.0 ± 3.1                                          | 0.33            |
| Waist-to-hip ratio                           | 0.90 ± 0.05                                      | 0.90 ± 0.05                                         | 0.88            |
| Systolic BP, mm Hg                           | 159 ± 21                                         | 160 ± 19                                            | 0.77            |
| Diastolic BP, mm Hg                          | 88 ± 12                                          | 90 ± 11                                             | 0.30            |
| Fasting serum glucose, mmol/L                | 6.2 ± 1.7                                        | 6.3 ± 1.9                                           | 0.66            |
| Lipids, mmol/L                               |                                                  |                                                     |                 |
| Total cholesterol                            | 5.7 ± 1.1                                        | 5.8 ± 1.1                                           | 0.82            |
| Triglycerides                                | 1.6 (1.1-2.3)                                    | 1.6 (1.1-2.4)                                       | 0.70            |
| HDL-C                                        | 1.3 ± 0.3                                        | 1.3 ± 0.3                                           | 0.92            |
| LDL-C                                        | 3.6 ± 0.9                                        | 3.6 ± 0.9                                           | 0.53            |
| Current smoking status, %                    | 18.0                                             | 23.8                                                | 0.11            |
| Current alcohol intake, %                    | 16.9                                             | 25.2                                                | 0.06            |
| Medical history, %                           |                                                  |                                                     |                 |
| Diabetes mellitus                            | 24.0                                             | 22.4                                                | 0.76            |
| Cardiovascular diseases                      | 44.4                                             | 24.5                                                | <0.001          |
| Baseline telomere length, Lg T/S ratio       | 0.13 ± 0.22                                      | 0.11 ± 0.19                                         | 0.46            |
| Annual telomere attrition rate, Lg T/S ratio | 0.04 ± 0.2                                       | 0.06 ± 0.2                                          | 0.28            |

**Abbreviations:** BMI, body mass index; BP, blood pressure; HDL-C, high-density lipoprotein cholesterol; LDL-C, low-density lipoprotein cholesterol. Data are given mean ± SD, or median (interquartile range). The leukocytes telomere length was expressed as Lg T/S ratio.

\**P* value was calculated by the chi-square test for categorical variables, or the *t* test for continuous variables, or the Mann-Whitney *U* test for triglycerides between the two groups.

# SUPPLEMENTARY DATA

**Supplementary Table 4.** Predictors of annual telomere attrition rate as a continuous variable\*

| Variables                     | Annual telomere attrition rate   |                             |                                           |                             |
|-------------------------------|----------------------------------|-----------------------------|-------------------------------------------|-----------------------------|
|                               | $\beta$ coefficient <sup>†</sup> | <i>P</i> value <sup>†</sup> | Adjusted $\beta$ coefficient <sup>‡</sup> | <i>P</i> value <sup>‡</sup> |
| Age, years                    | -0.04                            | 0.21                        | -0.12                                     | <0.001                      |
| BMI, kg/m <sup>2</sup>        | -0.005                           | 0.86                        | 0.01                                      | 0.67                        |
| Waist-to-hip ratio            | -0.03                            | 0.40                        | -0.04                                     | 0.17                        |
| Systolic BP, mm Hg            | 0.03                             | 0.32                        | 0.001                                     | 0.96                        |
| Diastolic BP, mm Hg           | 0.001                            | 0.98                        | 0.03                                      | 0.24                        |
| Fasting serum glucose, mmol/L | 0.04                             | 0.19                        | 0.001                                     | 0.97                        |
| Serum creatine, $\mu$ mol/L   | -0.02                            | 0.60                        | -0.04                                     | 0.13                        |
| Total cholesterol, mmol/L     | 0.007                            | 0.83                        | 0.01                                      | 0.59                        |
| Triglycerides, mmol/L         | 0.01                             | 0.66                        | 0.02                                      | 0.49                        |
| HDL-C, mmol/L                 | 0.003                            | 0.92                        | <0.001                                    | 0.99                        |
| LDL-C, mmol/L                 | -0.03                            | 0.35                        | -0.01                                     | 0.64                        |
| Current smoking status        | -0.01                            | 0.72                        | 0.02                                      | 0.49                        |
| Current alcohol intake        | 0.03                             | 0.35                        | 0.02                                      | 0.55                        |

Abbreviations: BMI, body mass index; BP, blood pressure; HDL-C, high-density lipoprotein cholesterol; LDL-C, low-density lipoprotein cholesterol.

\*Telomere length was presented as Lg T/S ratio.

<sup>†</sup>The  $\beta$  coefficient and *P* value were calculated by linear regression analysis.

<sup>‡</sup>Adjusted  $\beta$  coefficient and *P* value were obtained by linear regression analysis after adjustment for baseline telomere length.

# SUPPLEMENTARY DATA

**Supplementary Table 5.** Characteristics of patients with different stages of baseline blood pressure.

| Characteristics                          | Patients with controlled BP (n=144) | Patients with stage 1 hypertension (n=380) | Patients with stage 2 hypertension (n=379) | Patients with stage 3 hypertension (n=205) | P value* |
|------------------------------------------|-------------------------------------|--------------------------------------------|--------------------------------------------|--------------------------------------------|----------|
| Age, years                               | 59.5 ± 8.9                          | 60.5 ± 9.6                                 | 62.8 ± 9.9 <sup>##</sup>                   | 63.5 ± 9.7 <sup>##</sup>                   | <0.001   |
| Men, No. (%)                             | 53 (36.8%)                          | 145 (38.2%)                                | 146 (38.5%)                                | 86 (42.0%)                                 | 0.76     |
| BMI, kg/m <sup>2</sup>                   | 26.3 ± 3.2                          | 26.2 ± 3.1                                 | 26.0 ± 3.1                                 | 26.7 ± 3.1                                 | 0.05     |
| Waist-to-hip ratio                       | 0.90 ± 0.05                         | 0.90 ± 0.05                                | 0.90 ± 0.06                                | 0.90 ± 0.05                                | 0.91     |
| Systolic BP, mm Hg                       | 129 ± 7                             | 148 ± 7 <sup>##</sup>                      | 166 ± 8 <sup>##</sup>                      | 189 ± 14 <sup>##</sup>                     | <0.001   |
| Diastolic BP, mm Hg                      | 79 ± 6                              | 86 ± 7 <sup>##</sup>                       | 90 ± 11 <sup>##</sup>                      | 96 ± 16 <sup>##</sup>                      | <0.001   |
| Fasting serum glucose, mmol/L            | 5.9 ± 1.3                           | 6.2 ± 1.7                                  | 6.2 ± 2.1                                  | 6.5 ± 2.1 <sup>##</sup>                    | 0.01     |
| Lipids, mmol/L                           |                                     |                                            |                                            |                                            |          |
| Total cholesterol                        | 5.5 ± 1.0                           | 5.7 ± 1.1                                  | 5.7 ± 1.1                                  | 5.7 ± 1.1                                  | 0.82     |
| Triglycerides                            | 1.5 (1.2-2.2)                       | 1.7 (1.1-2.3)                              | 1.7 (1.1-2.4)                              | 1.6 (1.1-2.5)                              | 0.70     |
| HDL-C                                    | 1.3 ± 0.2                           | 1.3 ± 0.3                                  | 1.3 ± 0.3                                  | 1.4 ± 0.3                                  | 0.50     |
| LDL-C                                    | 3.5 ± 0.8                           | 3.6 ± 0.9                                  | 3.6 ± 0.9                                  | 3.6 ± 0.8                                  | 0.63     |
| Current smoking status, %                | 20.8                                | 19.2                                       | 16.9                                       | 20.0                                       | 0.67     |
| Current alcohol intake, %                | 17.6                                | 16.1                                       | 18.6                                       | 20.6                                       | 0.58     |
| Medical history, %                       |                                     |                                            |                                            |                                            |          |
| Diabetes mellitus                        | 20.1                                | 24.2                                       | 23.7                                       | 25.9                                       | 0.67     |
| Cardiovascular diseases                  | 40.3                                | 38.2                                       | 42.2                                       | 48.8                                       | 0.10     |
| Leukocytes telomere length, Lg T/S ratio |                                     |                                            |                                            |                                            |          |
| At baseline                              | 0.17 ± 0.23                         | 0.12 ± 0.21 <sup>#</sup>                   | 0.13 ± 0.22 <sup>#</sup>                   | 0.11 ± 0.21 <sup>#</sup>                   | 0.14     |
| At follow-up                             | 0.26 ± 0.25                         | 0.24 ± 0.27                                | 0.24 ± 0.29                                | 0.24 ± 0.28                                | 0.76     |

Abbreviations: BMI, body mass index; BP, blood pressure; HDL-C, high-density lipoprotein cholesterol; LDL-C, low-density lipoprotein cholesterol; T, telomere repeat copy; S, single-copy gene globin copy. Data were given as mean ± SD, number (%), or median (interquartile range). The leukocytes telomere length was expressed as Lg T/S ratio.

The controlled BP was defined as BP < 140/90 mm Hg, stage 1 as SBP 140-159 mmHg and/or DBP 90-99 mm Hg, stage 2 as SBP 160-179 mmHg and/or DBP 100-109 mm Hg, and stage 3 as SBP ≥ 180 mm Hg, and/or DBP ≥ 110 mm Hg [5].

\*P values were calculated among the different stages of hypertension by the chi-square test for categorical variables, the ANOVA test for continuous variables, or the Kruskal-Wallis test for triglycerides.

<sup>#</sup>P < 0.05, <sup>##</sup>P < 0.001, two-sample comparisons between patients with controlled BP and those with stage 1, or stage 2, or stage 3 hypertension, respectively. The student t-test was used for comparison of continuous variables, the chi-square test for categorical variables, and the Mann-Whitney U test for triglycerides.

# SUPPLEMENTARY DATA

**Supplementary Table 6.** Blood pressure lowering in the lengthen and shorten groups during 2014-2016 stratified by age and gender.

| Variables           | Mean (95%CI) of BP change*, mm Hg |                      | Adjusted mean (95%CI) of BP change†, mm Hg |                     | Mean difference (95%CI) of BP change between shorten and lengthen group‡, mm Hg | P value‡ |
|---------------------|-----------------------------------|----------------------|--------------------------------------------|---------------------|---------------------------------------------------------------------------------|----------|
|                     | Shorten group                     | Lengthen group       | Shorten group                              | Lengthen group      |                                                                                 |          |
| <b>ΔSBP</b>         |                                   |                      |                                            |                     |                                                                                 |          |
| Total sample(1,108) | -7.9 (-10.2, -5.6)                | -11.9 (-13.7, -10.2) | -6.9 (-10.1, -2.9)                         | -10.2 (-12.8, -7.6) | -3.3 (-6.2, -0.3)                                                               | 0.03     |
| Men (n=430)         | -9.7 (-13.3, -6.0)                | -12.1 (-14.9, -9.3)  | -9.1 (-13.4, -4.8)                         | -10.5 (-13.9, -7.0) | -1.4 (-6.0, 3.1)                                                                | 0.56     |
| Women (n=678)       | -6.7 (-9.7, -3.8)                 | -11.8 (-14.0, -10.2) | -8.1 (-13.2, -3.1)                         | -12.5 (-17.2, -7.9) | -4.4 (-8.2, -0.6)                                                               | 0.02     |
| ≤60 years (n=506)   | -5.4 (-8.5, -2.2)                 | -12.2 (-14.6, -9.8)  | -5.6 (-9.5, -1.7)                          | -11.3 (-14.3, -8.3) | -5.7 (-9.9, -1.6)                                                               | 0.007    |
| >60 years (n=602)   | -9.9 (-13.1, -6.6)                | -11.6 (-14.2, -9.1)  | -8.2 (-11.8, -4.6)                         | -8.9 (-11.8, -5.9)  | -0.7 (-4.8, 3.5)                                                                | 0.75     |
| <b>ΔDBP</b>         |                                   |                      |                                            |                     |                                                                                 |          |
| Total sample(1,108) | -2.1 (-3.1, -1.0)                 | -3.1 (-4.0, -2.1)    | -1.4 (-3.1, 0.3)                           | -2.3 (-3.7, -0.9)   | -0.9 (-2.5, 0.7)                                                                | 0.29     |
| Men (n=430)         | -2.9 (-4.8, -1.1)                 | -4.2 (-5.8, -2.7)    | -1.9 (-4.3, 0.5)                           | -2.6 (-4.5, -0.7)   | -0.7 (-3.3, 1.8)                                                                | 0.57     |
| Women (n=678)       | -1.5 (-2.8, -0.2)                 | -2.3 (-3.5, -1.2)    | -2.7 (-6.6, 1.2)                           | -3.9 (-7.8, -0.03)  | -1.2 (-3.2, 0.9)                                                                | 0.27     |
| ≤60 years (n=506)   | -1.7 (-3.4, -0.1)                 | -4.1 (-5.5, -2.8)    | -1.9 (-4.3, 0.6)                           | -4.4 (-6.3, -2.5)   | -2.5 (-5.0, -0.1)                                                               | 0.03     |
| >60 years (n=602)   | -2.3 (-3.8, -0.9)                 | -2.1 (-3.3, -0.9)    | -1.6 (-3.6, 0.4)                           | -0.7 (-2.5, 1.0)    | 0.9 (-1.2, 3.0)                                                                 | 0.42     |
| <b>ΔPP</b>          |                                   |                      |                                            |                     |                                                                                 |          |
| Total sample(1,108) | -5.8 (-7.7, -3.9)                 | -8.8 (-10.2, -7.5)   | -5.5 (-8.1, -2.9)                          | -7.9 (-10.0, -5.8)  | -2.4 (-4.9, -0.1)                                                               | 0.04     |
| Men (n=430)         | -6.7 (-9.6, -3.8)                 | -7.8 (-10.0, -5.7)   | -7.2 (-10.6, -3.8)                         | -7.9 (-10.6, -5.2)  | -0.7 (-4.3, 2.9)                                                                | 0.72     |
| Women (n=678)       | -5.2 (-7.8, -2.7)                 | -9.5 (-11.3, -7.7)   | -4.9 (-7.8, -2.0)                          | -8.1 (-10.3, -5.9)  | -3.2 (-6.3, -0.1)                                                               | 0.04     |
| ≤60 years (n=506)   | -3.6 (-6.2, -1.0)                 | -8.1 (-9.8, -6.4)    | -4.3 (-7.3, -1.3)                          | -7.4 (-9.7, -5.2)   | -3.1 (-6.1, -0.1)                                                               | 0.04     |
| >60 years (n=602)   | -7.6 (-10.3, -4.8)                | -9.5 (-11.6, -7.4)   | -6.5 (-9.6, -3.4)                          | -7.9 (-10.4, -5.4)  | -1.4 (-4.9, 2.1)                                                                | 0.43     |

**Abbreviations:** SBP, systolic blood pressure; DBP, diastolic blood pressure; PP, pulse pressure (PP=SBP-DBP); CI, confidence interval.

\*Mean (95%CI) was calculated by the *t* test.

†Adjusted mean (95%CI) and *P* value were examined by generalized linear model which adjusted for baseline characteristics including age, gender (except for the gender stratification), smoking and alcohol status, medical history, leukocytes telomere length, the stage of baseline blood pressures, and changes in BMI, waist-to-hip, serum fasting glucose, total cholesterol, triglycerides, HDL-C, and LDL-C from 2014 to 2016.

# SUPPLEMENTARY DATA

**Supplementary Table 7.** Effects of antihypertensive drugs on BP lowering in the lengthen and shorten groups during 2014-2016.

| Variables           | Mean (95%CI) of BP change*,<br>mm Hg |                      | Adjusted mean (95%CI) of BP<br>change†, mm Hg |                      | Mean difference<br>(95%CI) of BP change<br>between shorten and<br>lengthen group†, mm Hg | P<br>value† |
|---------------------|--------------------------------------|----------------------|-----------------------------------------------|----------------------|------------------------------------------------------------------------------------------|-------------|
|                     | Shorten group                        | Lengthen group       | Shorten group                                 | Lengthen group       |                                                                                          |             |
| <b>ΔSBP</b>         |                                      |                      |                                               |                      |                                                                                          |             |
| CCB (n=744)         | -9.9(-12.9, -6.9)                    | -14.5 (-16.7, -12.3) | -8.8(-13.3, -4.2)                             | -14.2 (-17.9, -10.5) | -5.4 (-9.7, -1.1)                                                                        | 0.01        |
| ARB (n=590)         | -7.4 (-10.7, -4.1)                   | -12.2 (-14.6, -9.9)  | -7.3 (-10.6, -4.0)                            | -12.0 (-14.3, -9.1)  | -4.7 (-8.7, -0.6)                                                                        | 0.02        |
| Diuretic<br>(n=300) | -7.6 (-11.9, -3.2)                   | -12.1 (-15.6, -8.5)  | -11.2 (-17.0, -5.4)                           | -13.8 (-18.5, -9.1)  | -2.6 (-9.2, 4.0)                                                                         | 0.44        |
| <b>ΔDBP</b>         |                                      |                      |                                               |                      |                                                                                          |             |
| CCB (n=744)         | -2.5 (-3.9, -1.0)                    | -4.1 (-5.3, -3.0)    | -1.8 (-4.1, -0.4)                             | -3.7 (-5.5, -1.9)    | -1.9 (-4.0, 0.3)                                                                         | 0.08        |
| ARB (n=590)         | -2.0 (-3.6, -0.4)                    | -3.3 (-4.5, -2.0)    | -2.5 (-4.3, -0.8)                             | -3.9 (-5.2, -2.6)    | -1.4 (-3.4, 0.7)                                                                         | 0.20        |
| Diuretic<br>(n=300) | -2.4 (-4.5, -0.3)                    | -4.2 (-6.1, -2.3)    | -2.7 (-5.7, 0.2)                              | -4.1 (-6.5, -1.8)    | -1.4 (-4.7, 1.9)                                                                         | 0.41        |
| <b>ΔPP</b>          |                                      |                      |                                               |                      |                                                                                          |             |
| CCB (n=744)         | -7.4 (-9.9, -4.9)                    | -10.4 (-12.1, -8.7)  | -6.9 (-10.4, -3.4)                            | -10.5 (-13.4, -7.6)  | -3.6 (-6.9, -0.3)                                                                        | 0.03        |
| ARB (n=590)         | -5.3 (-8.0, -2.6)                    | -8.9 (-10.8, -7.1)   | -5.1 (-7.7, -2.5)                             | -8.6 (-10.5, -6.8)   | -3.5 (-6.7, -0.3)                                                                        | 0.03        |
| Diuretic<br>(n=300) | -5.1 (-8.6, -1.7)                    | -7.9 (-10.6, -5.2)   | -8.4 (-12.9, -4.0)                            | -9.6 (-13.2, -6.0)   | -1.2 (-6.3, 3.9)                                                                         | 0.65        |

**Abbreviations:** SBP, systolic blood pressure; DBP, diastolic blood pressure; PP, pulse pressure (PP=SBP-DBP); CCB, calcium channel blocker; ARB, angiotensin receptor blocker; CI, confidence interval.

\*Mean (95%CI) was calculated by the *t* test. †Adjusted mean (95%CI) and *P* value were examined by generalized linear model which adjusted for the covariates mentioned in the footnote of Supplementary Table 6.

# SUPPLEMENTARY DATA

**Supplementary Table 8.** The association of annual telomere attrition rate with cardiovascular events during 2014-2016.

| Outcomes                                      | The shorten group | The lengthen group | <i>P</i> value |
|-----------------------------------------------|-------------------|--------------------|----------------|
| <b>Total patients (n=1,108)</b>               | 386               | 722                |                |
| Total CVD, n                                  | 30                | 40                 |                |
| Person-years                                  | 826               | 1,568              |                |
| HR (95% CI), Model I*                         | 1.0               | 0.73 (0.44-1.19)   | 0.21           |
| HR (95% CI), Model II†                        | 1.0               | 0.77 (0.47-1.27)   | 0.31           |
| Coronary heart diseases, n                    | 15                | 18                 |                |
| Person-years                                  | 839               | 1,585              |                |
| HR (95% CI), Model I*                         | 1.0               | 0.49 (0.22-1.09)   | 0.08           |
| HR (95% CI), Model II†                        | 1.0               | 0.71 (0.35-1.43)   | 0.33           |
| Stroke, n                                     | 17                | 23                 |                |
| Person-years                                  | 834               | 1,576              |                |
| HR (95% CI), Model I*                         | 1.0               | 0.77 (0.39-1.52)   | 0.45           |
| HR (95% CI), Model II†                        | 1.0               | 0.75 (0.37-1.49)   | 0.41           |
| <b>Patients with CCB therapy (n=781)</b>      | 251               | 493                |                |
| Total CVD, n                                  | 23                | 30                 |                |
| Person-years                                  | 537               | 1,069              |                |
| HR (95% CI), Model I*                         | 1.0               | 0.66 (0.38-1.15)   | 0.14           |
| HR (95% CI), Model II†                        | 1.0               | 0.60 (0.34-1.06)   | 0.08           |
| <b>Patients with ARB therapy (n=590)</b>      | 192               | 398                |                |
| Total CVD, n                                  | 9                 | 22                 |                |
| Person-years                                  | 418               | 863                |                |
| HR (95% CI), Model I*                         | 1.0               | 1.10 (0.46-2.64)   | 0.84           |
| HR (95% CI), Model II†                        | 1.0               | 1.30 (0.56-3.02)   | 0.55           |
| <b>Patients with diuretic therapy (n=300)</b> | 104               | 196                |                |
| Total CVD, n                                  | 8                 | 10                 |                |
| Person-years                                  | 223               | 426                |                |
| HR (95% CI), Model I*                         | 1.0               | 0.52 (0.19-1.46)   | 0.21           |
| HR (95% CI), Model II†                        | 1.0               | 0.56 (0.19-1.63)   | 0.29           |

**Abbreviations:** HR, hazard ratio; CI, confidence interval; CCB, calcium channel blocker; ARB, angiotensin receptor blocker; CVD, cardiovascular disease.

HR (95% CI) and *P* value were examined by the Cox proportional-hazards regression model.

\*Model I adjusted for baseline characteristics including age, gender, BMI, waist-to-hip, smoking and alcohol status, medical history, leukocytes telomere length, serum fasting glucose, total cholesterol, triglycerides, HDL-C, and LDL-C. †Model II further adjusted for changes in BMI, serum fasting glucose, total cholesterol, triglycerides, HDL-C, and LDL-C from 2014 to 2016, besides the covariates in Model I.



## SUPPLEMENTARY DATA

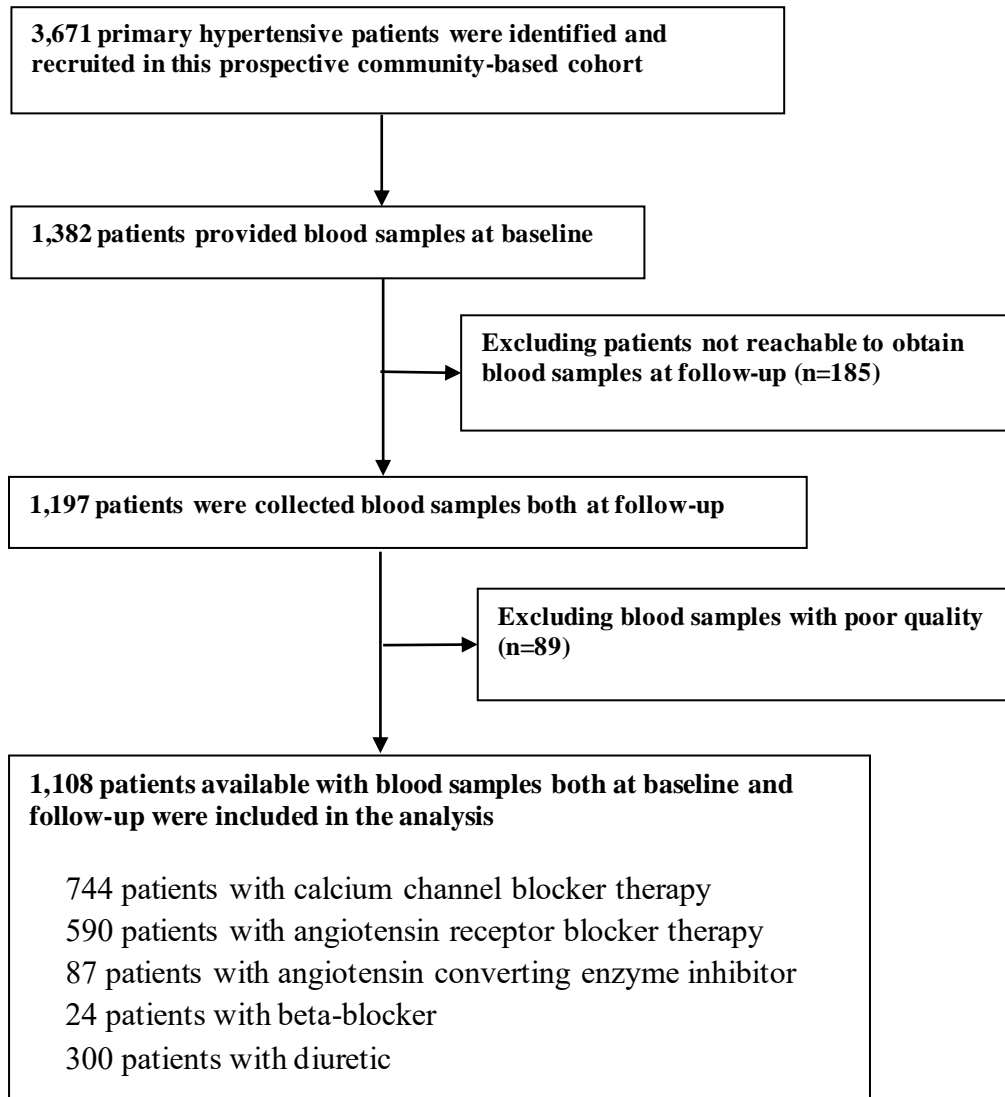

**Supplementary Figure 1. Flowchart of the current analysis.**

# SUPPLEMENTARY DATA

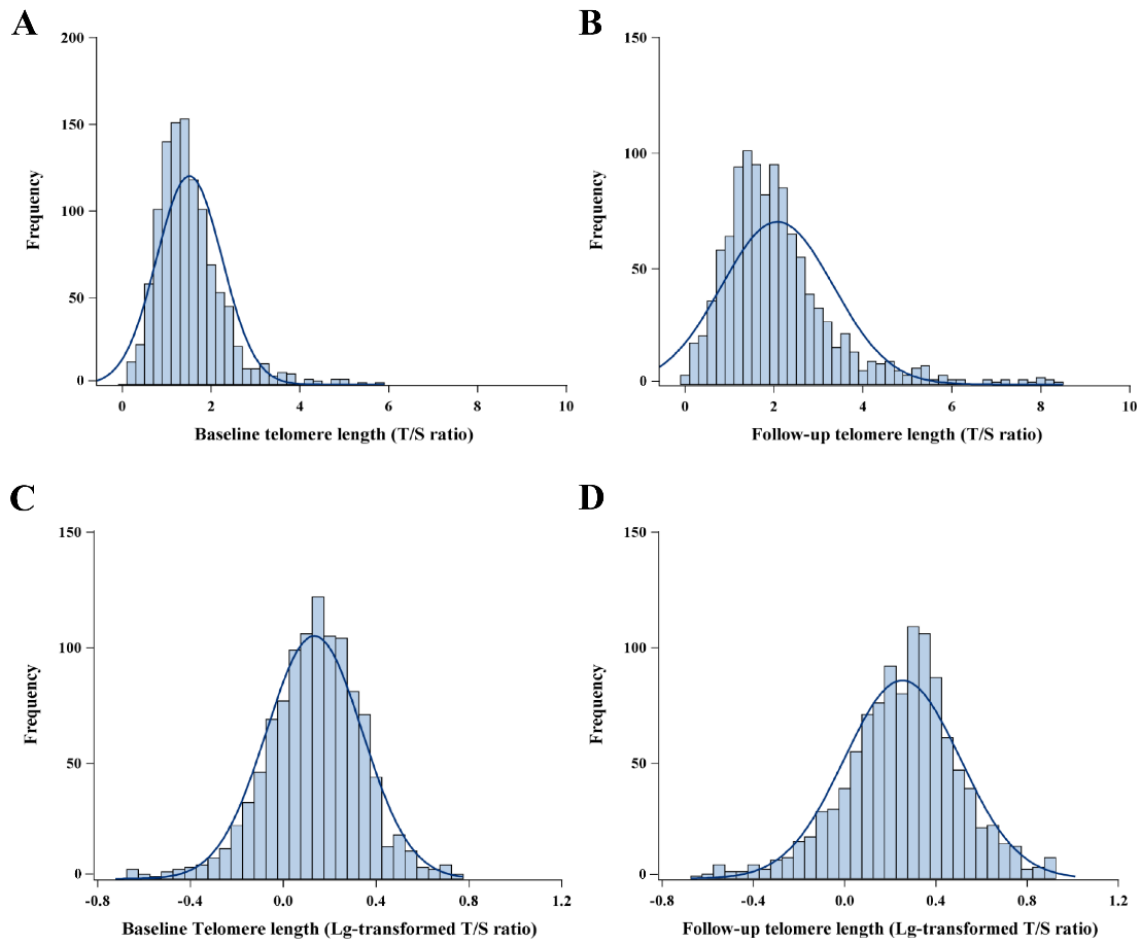

**Supplementary Figure 2. The frequency distribution of baseline telomere length and follow-up telomere length in this cohort.** (A) Skewed distribution of baseline telomere length of leukocytes; (B) Skewed distribution of follow-up telomere length of leukocytes; (C) Normalized distribution of Lg-transformed baseline telomere length of leukocytes; (D) Normalized distribution of Lg-transformed follow-up telomere length of leukocytes.

SUPPLEMENTARY DATA

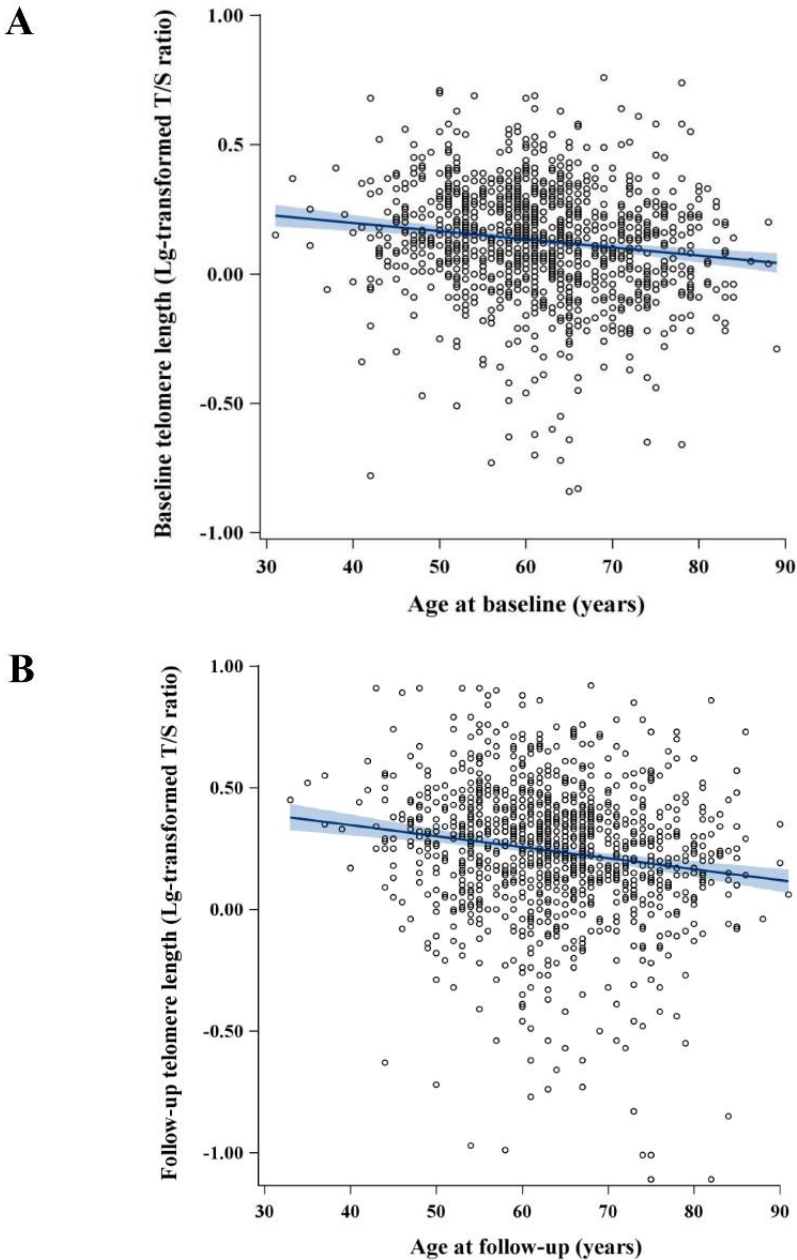

**Supplementary Figure 3. The inverse correlations between age and telomere length at baseline and at follow-up.** (A) Linear regression between baseline telomere length and age,  $\beta$  value was -0.14 ( $P < 0.001$ ); (B) Linear regression between follow-up telomere length and age,  $\beta$  value was -0.16 ( $P < 0.001$ ).

## SUPPLEMENTARY DATA

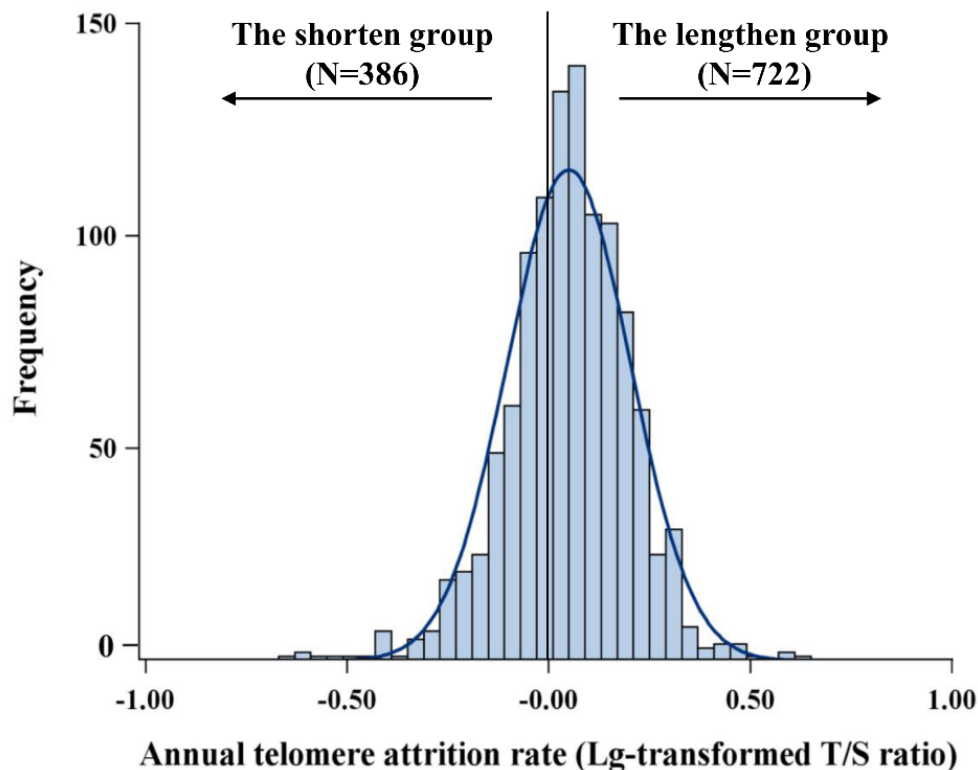

**Supplementary Figure 4. The frequency distribution of annual telomere attrition rate during 2014-2016.** The annual telomere attrition rate was calculated using the formula: (follow-up telomere length - baseline telomere length)/follow-up years, in which telomere length was transformed as Lg T/S ratio. All participants were categorized into two groups, of those who experienced telomere length shortening (annual rate of telomere attrition  $<0$ ) were categorized as “shorten group”, and those who experienced an increase of telomere length (annual rate of telomere attrition  $>0$ ) as “lengthen group”.

## SUPPLEMENTARY DATA

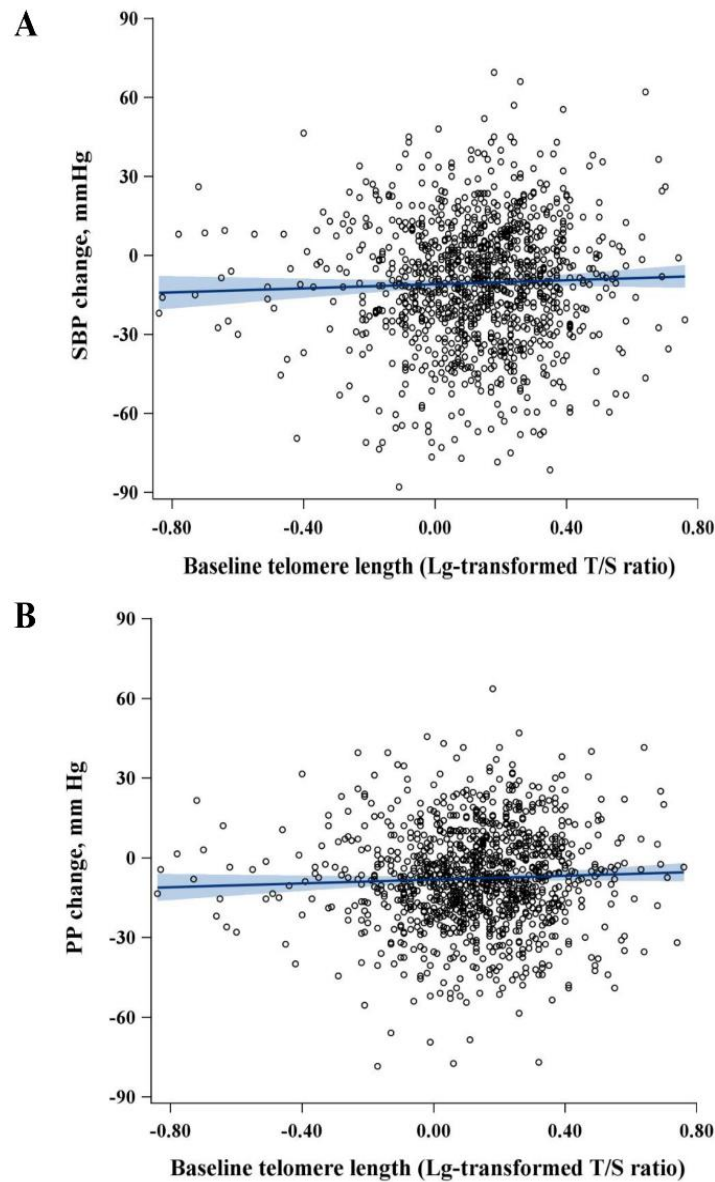

**Supplementary Figure 5. No correlations between baseline telomere length and blood pressure change during 2014-2016.** Abbreviations: SBP, systolic blood pressure; PP, pulse pressure. (A) Linear regression between baseline telomere length and SBP change,  $\beta$  value was 0.04 ( $P=0.25$ ); (B) Linear regression between baseline telomere length and PP change,  $\beta$  value was 0.04 ( $P=0.18$ ).

# SUPPLEMENTARY DATA

## References

- [1] National High Blood Pressure Education Program. The Seventh Report of the Joint National Committee on Prevention, Detection, Evaluation, and Treatment of High Blood Pressure. Bethesda (MD): National Heart, Lung, and Blood Institute (US), 2004.
- [2] Tunstall-Pedoe H, Kuulasmaa K, Amouyel P, Arveiler D, Rajakangas AM, Pajak A (1994). Myocardial infarction and coronary deaths in the world health organization monica project. Registration procedures, event rates, and case-fatality rates in 38 populations from 21 countries in four continents. *Circulation*, 90(1):583–612.
- [3] Thygesen K, Alpert JS, Jaffe AS, Simoons ML, Chaitman BR, White HD (2012). Third universal definition of myocardial infarction. *Glob Heart*, 7(4):275-295.
- [4] World Health Organization (1989). Recommendations on stroke prevention, diagnosis, and therapy. Report of the WHO task force on stroke and other cerebrovascular disorders. *Stroke*, 20(10):1407–1431.
- [5] Liu LS (2011). 2010 Chinese guidelines for the management of hypertension. *Zhonghua Xin Xue Guan Bing Za Zhi*, 39(7):579-615.
